# Supplementary material for: Wet spinning of sodium carboxymethyl cellulose–sodium caseinate hydrogel fibres: relationship between rheology and spinnability
Source: Royal Society of Chemistry journal article supplement (doi:10.1039/d4sm00705k), 2025-01-01
Supplement: d4sm00705k1.pdf [file d4sm00705k1.pdf]

---

1 **Supporting Information**

---

2 **Wet Spinning of Sodium Carboxymethyl Cellulose - Sodium**  
3 **Caseinate Hydrogel Fibres: Relationship between Rheology and**  
4 **Spinnability**

5

6 Lathika Vaniyan<sup>a</sup>, Pallab Kumar Borah<sup>a,f</sup>, Galina E. Pavlovskaya<sup>b</sup>, Nick Terrill<sup>c</sup>, Joshua E.S.J.  
7 Reid<sup>a</sup>, Michael Boehm<sup>d</sup>, Philippe Prochasson<sup>d</sup>, Reed A. Nicholson<sup>d</sup>, Stefan Baier<sup>d,e</sup>, Gleb E.  
8 Yakubov<sup>\*a,g</sup>

9

10 <sup>a</sup>*Food Materials Research Group, University of Nottingham, Sutton Bonington, LE12 5RD,*  
11 *United Kingdom*

12 <sup>b</sup>*Sir Peter Mansfield Imaging Centre, University of Nottingham, Nottingham, NG7 2RD,*  
13 *United Kingdom*

14 <sup>c</sup>*Diamond Light Source, Harwell Science and Innovation Campus, Didcot, OX11 0DE, United*  
15 *Kingdom*

16 <sup>d</sup>*Motif FoodWorks Inc, 27 Drydock Avenue, Boston, MA 02210, USA.*

17 <sup>e</sup>*School of Chemical Engineering, University of Queensland, Brisbane, QLD 4072, Australia.*

18 <sup>f</sup>*Heinz Maier-Leibnitz Zentrum, Technical University of Munich, Lichtenbergstraße 1, 85748,*  
19 *Germany*

20 <sup>g</sup>*Food Biopolymers Laboratory, School of Food Science and Nutrition, University of Leeds,*  
21 *Leeds, LS2 9JT, United Kingdom*

22

23 \*Corresponding author: Gleb E. Yakubov, Professor of Food Biopolymers, School of Food  
24 Science and Nutrition, University of Leeds, Leeds, LS2 9JT, United Kingdom.

## 25 S1. Viscosity Measurements

26 NaCMC samples with varying concentrations (0.01%, 0.05%, and 0.1% w/v) were prepared in  
27 Milli-Q water, as well as in different concentrations of sodium chloride (10 mM, 30 mM, and  
28 100 mM) to adjust the ionic strength<sup>1,2</sup> and phosphate buffer (10 mM, 30 mM, and 100 mM)  
29 in order to keep the pH constant. The solutions were stirred overnight to ensure complete  
30 hydration of the NaCMC<sup>3</sup>. The viscosity of the solutions was measured using a MCR 301  
31 rheometer (Anton Paar GmbH, Austria) equipped with a Peltier temperature control system. A  
32 concentric cylinder geometry was utilised (CC27; outer diameter: 28.9 mm; inner diameter:  
33 26.66 mm; gap size: 1.13 mm; cone angle: 120°; effective cylinder height: 39.997 mm). From  
34 the kinematic viscosities, the relative, specific, and reduced viscosities of the NaCMC solutions  
35 were calculated at each concentration at 25 °C<sup>3</sup>. Finally, the intrinsic viscosities  $[\eta]$  were  
36 determined with the use of Solomon-Ciuta equation (please see section S3). The intrinsic  
37 viscosity values for 100 mM NaCl solvent show highest suppression of non-ideality, as evident  
38 from the weakest dependence of  $[\eta]$  on concentration ( $[\eta] = 20.1 \pm 0.8$  dL/g). This value was  
39 used to estimate the molecular weight ( $M_w$ ) of NaCMC using Bohdanecky relation<sup>4,5</sup> and the  
40 values of the persistence length ( $L_p = 14.3$  nm) reported in literature<sup>3</sup>. as:

$$41 \left( \frac{M_w^2}{[\eta]} \right)^{1/3} = A_0 M_L \phi^{-1/3} + B_0 \phi^{-1/3} \left( \frac{2L_p}{M_L} \right)^{-1/2} M_w^{1/2}$$

42 where  $\phi$  is the Flory–Fox constant ( $2.86 \times 10^{23} \text{ mol}^{-1}$ ) and  $A_0 = 1.053$  and  $B_0 = 1.016$  are  
43 tabulated coefficients<sup>5</sup>. The estimated values of  $M_w$  were found to be  $340 \pm 20$  kDa. For the  
44 lower limits of the  $L_p = 12$  nm, the estimated values of  $M_w$  were found to be  $\sim 470$  kDa. The  
45 determined range of molecular weights appears to be consistent with manufacturer  
46 specifications.

47

48 **S2. Intrinsic viscosity**

49 NaCMC has been extensively studied for its behaviour in various environments including  
50 solubility, viscosity, and interaction with other substances<sup>6-8</sup>. The intrinsic viscosity  $[\eta]$  was  
51 calculated using Solomon-Ciuta equation<sup>9</sup> as:

52 
$$[\eta] = \frac{1}{c} \sqrt{2\eta_{sp} \ln \eta_{rel}}$$

53 where  $\eta_{sp}$  is the specific viscosity,  $\eta_{rel}$  is the relative viscosity, and  $c$  is the polymer  
54 concentration (in g/dL).

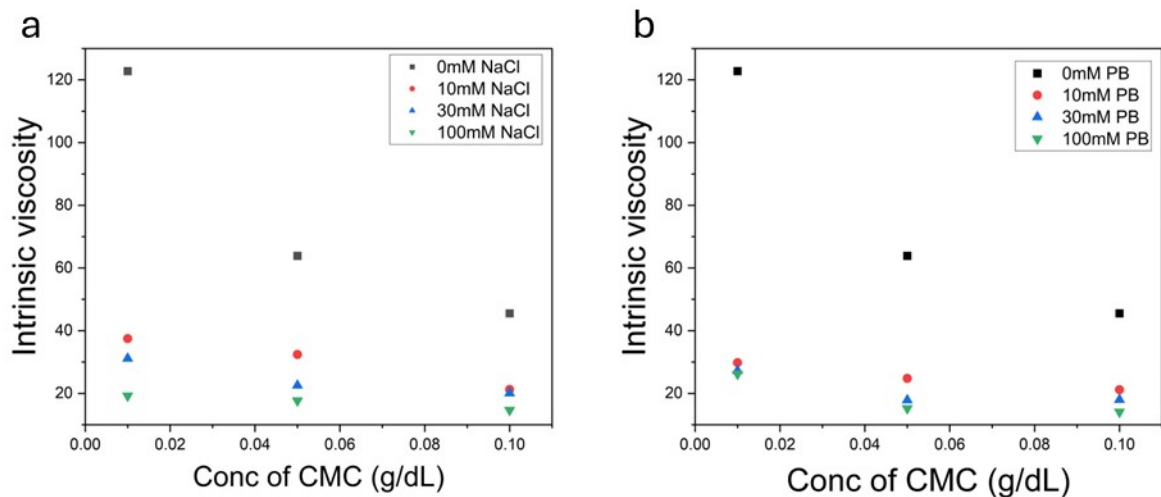

55

56 **Figure S1:** Intrinsic viscosity data for varying concentrations of CMC in different  
57 concentrations of NaCl and phosphate buffer.

58

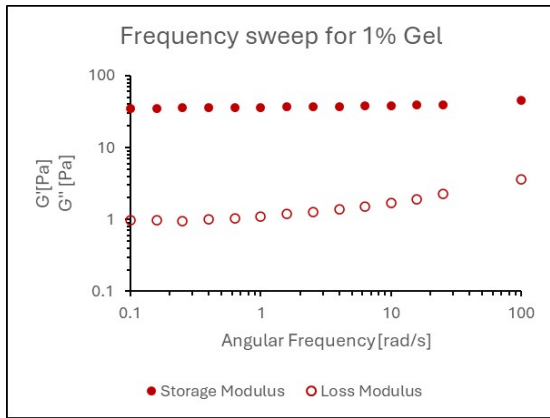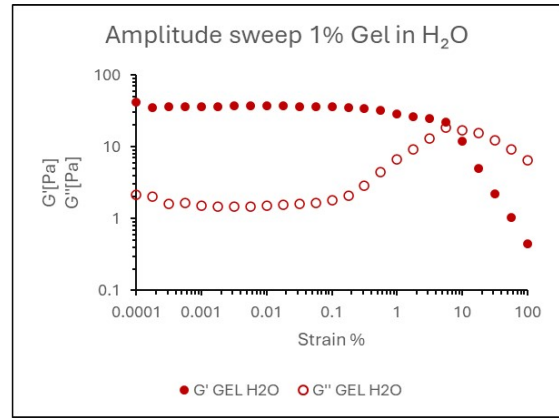

59

60 **Figure S2:** Oscillatory rheometry of 0.5%/0.5% NaCMC/NaCas: frequency (left panel) and  
 61 amplitude sweeps (right panel).

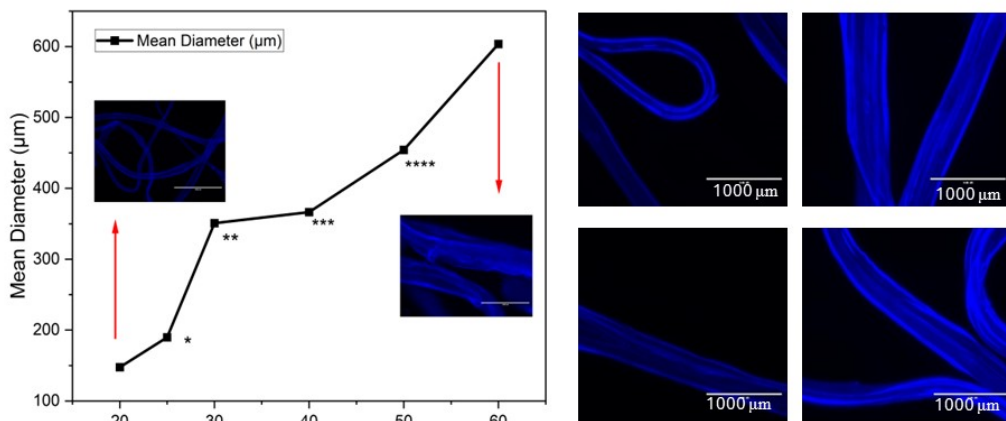

62

63 **Figure S3:** Images of hydrogel fibres formed at different cross-linking times, viewed using an  
 64 EVOS fluorescent microscope. Fibre diameters were calculated using ImageJ (NIH, USA).

65  
 66  
 67  
 68  
 69  
 70  
 71  
 72  
 73

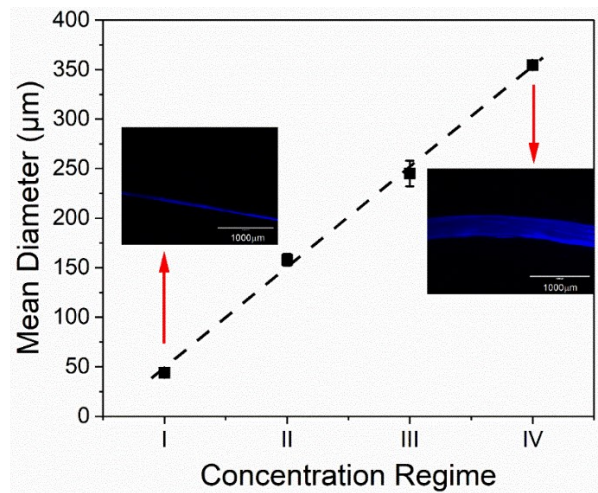

74

75 **Figure S4.** Fibre diameter in different concentration regimes. The weak hydrogels formed at  
76 lower concentrations resulted in thin filaments. By contrast, rapid gelation at higher polymer  
77 concentrations led to the formation of fibres with irregular thickness.

78

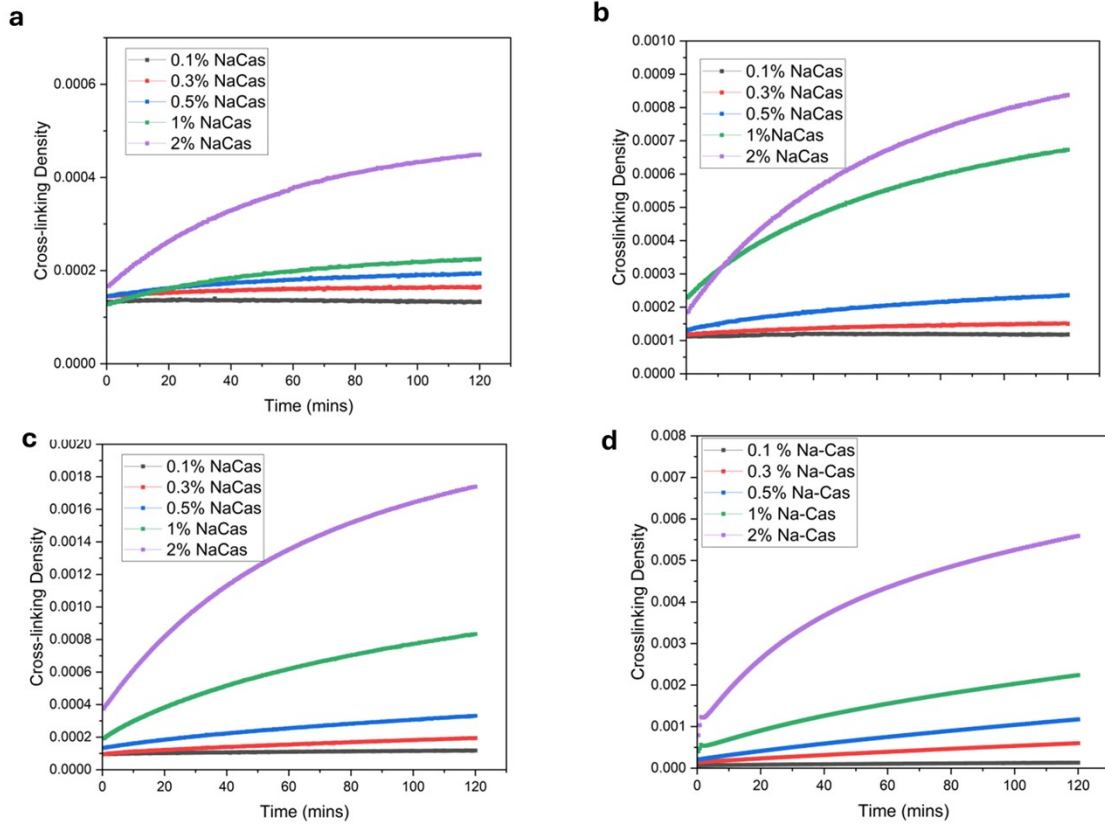

79

80 **Figure S5:** Crosslinking density as a function of time in the presence of EDC at various  
 81 concentrations: (a) 5 mM; (b) 10 mM; (c) 20 mM; (d) 50 mM.

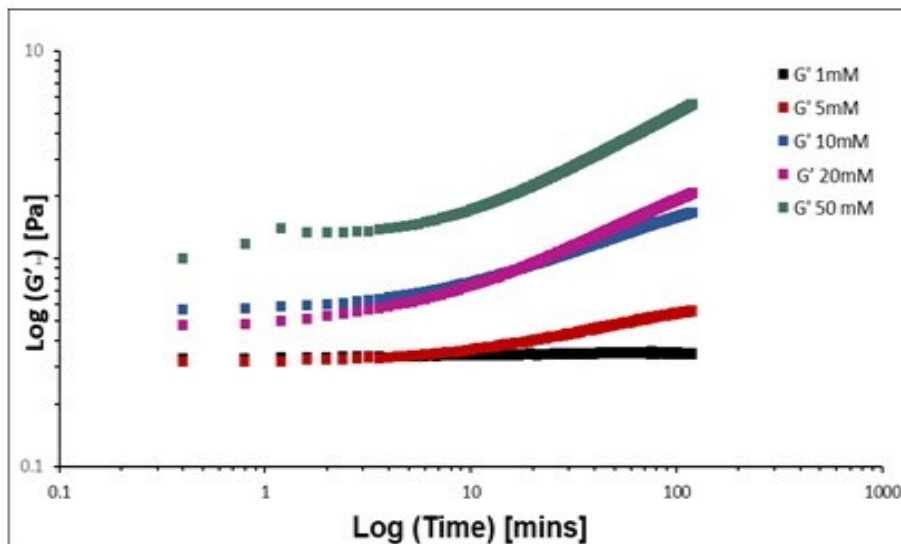

82

83 **Figure S6:** Change in  $G'$  values of NaCMC-NaCas (1:1 ratio) with respect to time at increasing  
 84 EDC concentrations.

85

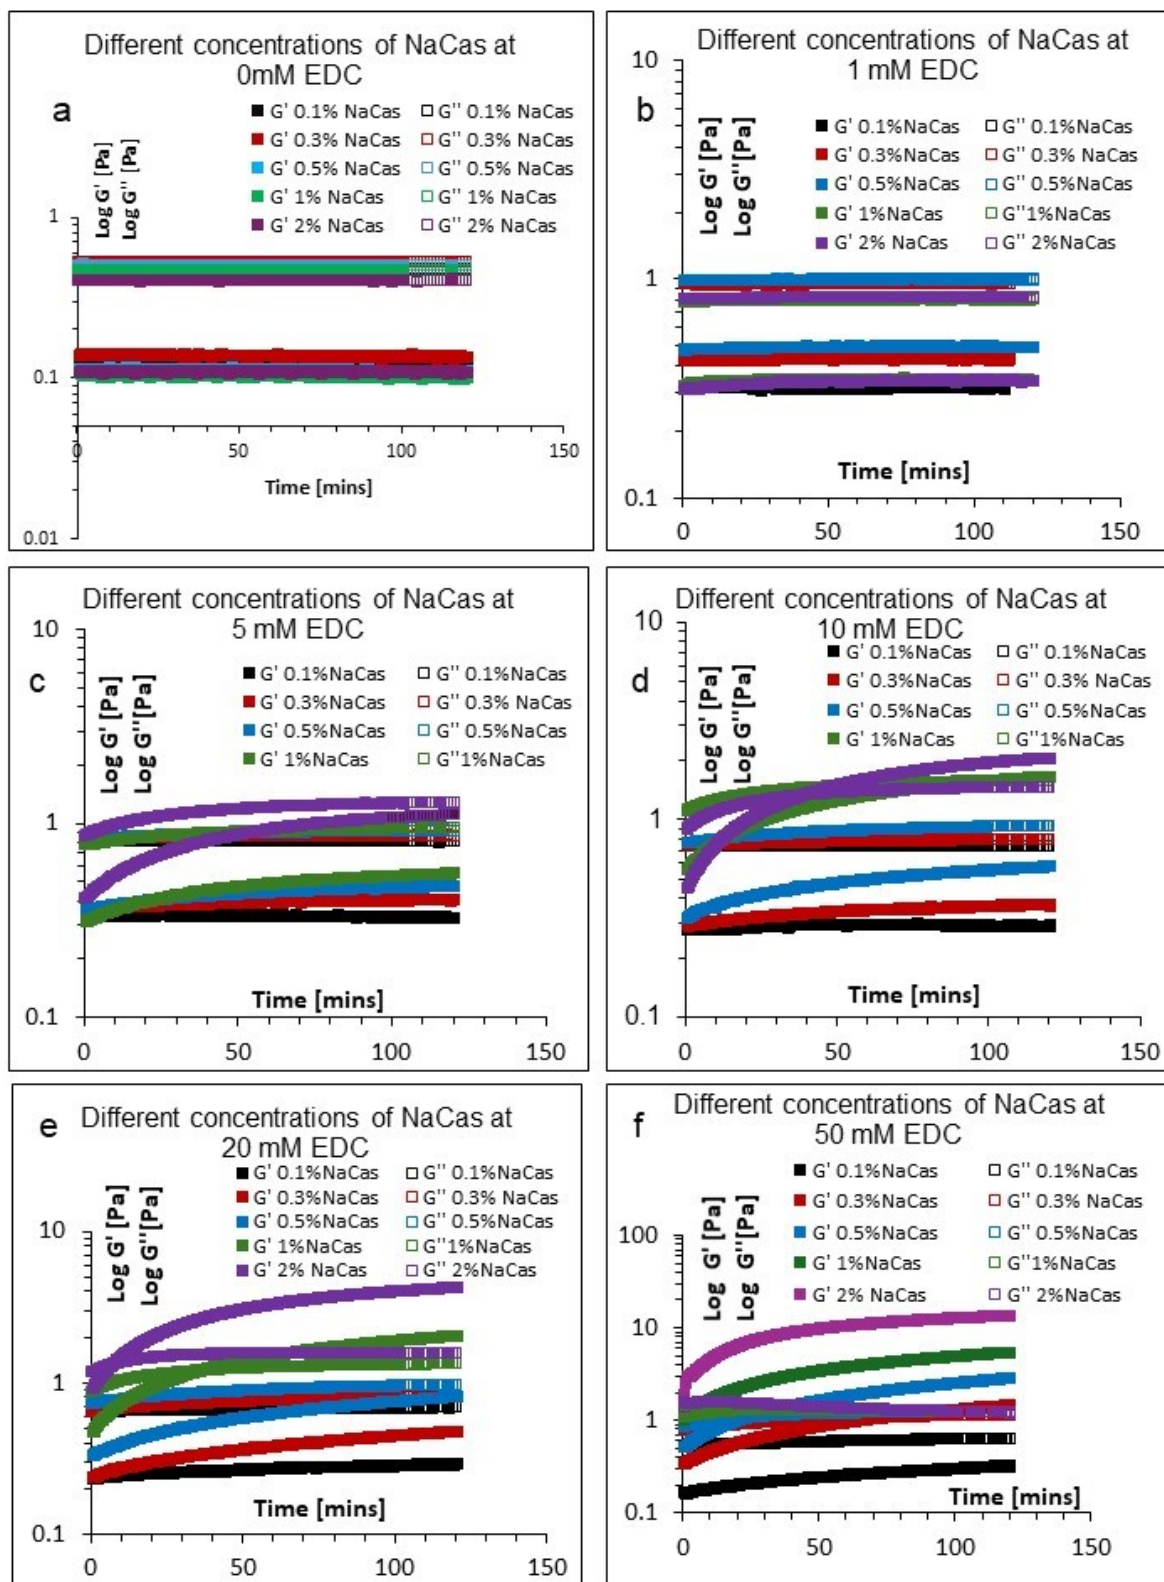

86

87 **Figure S7:**  $G'$  and  $G''$  values for different concentrations of NaCas with respect to time, in the  
 88 presence of EDC at various concentrations: (a) 0 mM, (b) 1 mM, (c) 5 mM, (d) 10 mM, (e) 20  
 89 mM, (f) 50 mM.

90

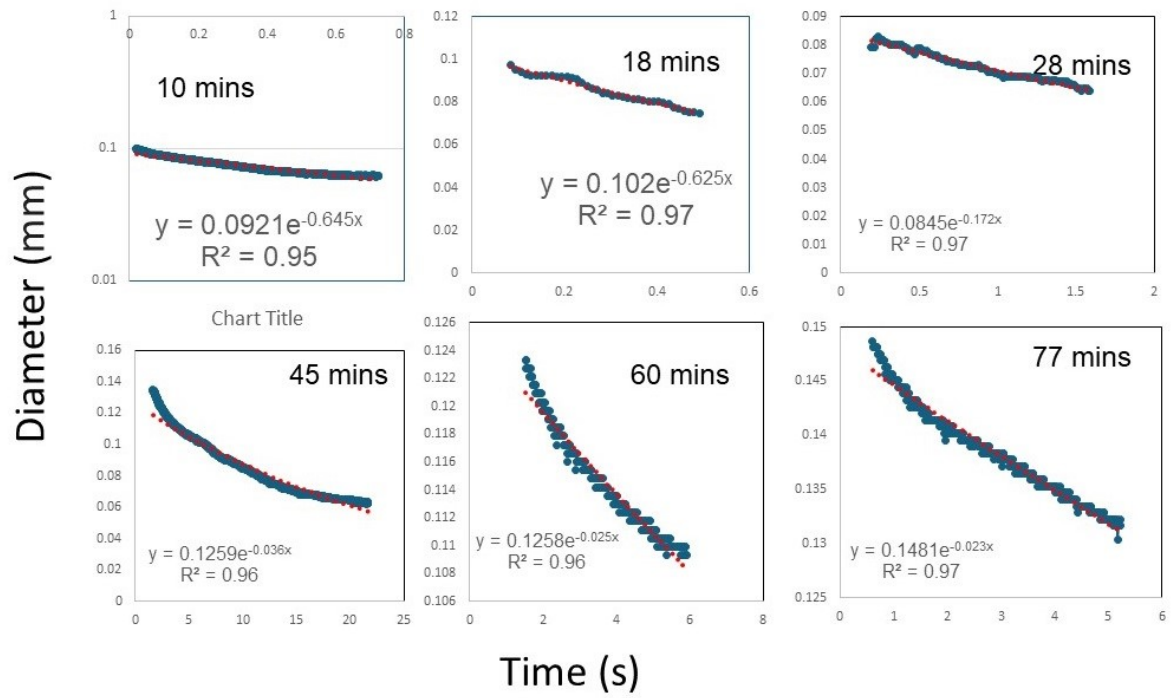

91

92 **Figure S8:** Fitted Curves for relaxation time. Red dotted line shows exponential fitting.



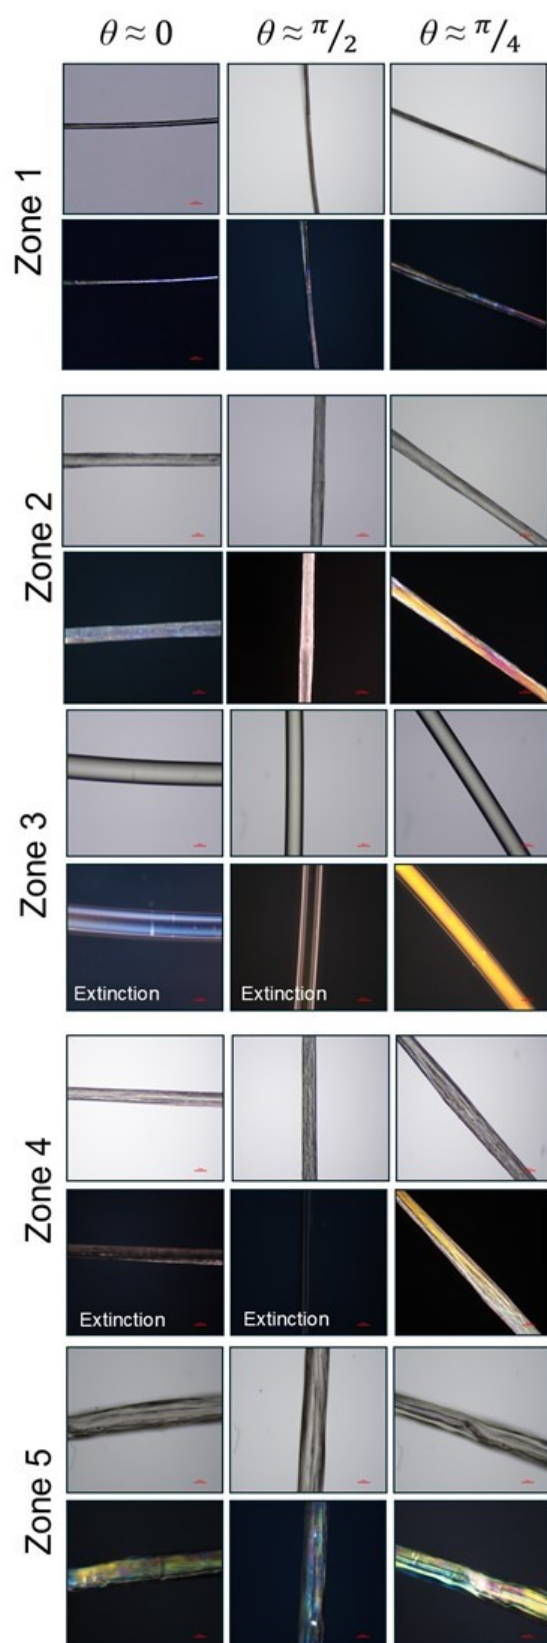

93

94 **Figure S9.** Fibre diameter in different zones. The weak hydrogels formed at lower  
 95 concentrations resulted in thin filaments. By contrast, rapid gelation at higher polymer  
 96 concentrations led to the formation of fibres with irregular thickness.

97

98 **Supplementary references.**

- 99 1. W. N. Sharratt, R. O'Connell, S. E. Rogers, C. G. Lopez and J. T. Cabral,  
100 *Macromolecules*, 2020, **53**, 1451-1463.
- 101 2. A. Gulati and C. G. Lopez, *ACS Macro Lett*, 2024, **13**, 1079-1083.
- 102 3. E. Arinaitwe and M. Pawlik, *Carbohydrate Polymers*, 2014, **99**, 423-431.
- 103 4. M. Pohl, G. A. Morris, S. E. Harding and T. Heinze, *European Polymer Journal*,  
104 2009, **45**, 1098-1110.
- 105 5. M. Bohdanecky, *Macromolecules*, 1983, **16**, 1483-1492.
- 106 6. C. G. Lopez, S. E. Rogers, R. H. Colby, P. Graham and J. T. Cabral, *Journal of*  
107 *Polymer Science Part B: Polymer Physics*, 2015, **53**, 492-501.
- 108 7. C. G. Lopez and W. Richtering, *Carbohydrate Polymers*, 2021, **267**, 118117.
- 109 8. M. Edali, M. N. Esmail and G. H. Vatistas, *Journal of Applied Polymer Science*,  
110 2001, **79**, 1787-1801.
- 111 9. R. Pamies, J. G. Hernández Cifre, M. del Carmen López Martínez and J. García de la  
112 Torre, *Colloid and Polymer Science*, 2008, **286**, 1223-1231.

113
